# Supplementary material
Source: publisher figshare collection journal article supplement (https://acs.figshare.com/ndownloader/files/31218739)
Supplement: Supplementary file [file 31218739]

# ***O*-Methylation in Carbohydrates: an NMR and MD Simulation Study with Application to Methylcellulose**

Alessandro Ruda<sup>1</sup>, Göran Widmalm<sup>1</sup>, and Jakob Wohler<sup>2,3</sup>

<sup>1</sup> Department of Organic Chemistry, Arrhenius Laboratory, Stockholm University, SE-106 91 Stockholm, Sweden

<sup>2</sup> Department of Fiber and Polymer Technology, School of Chemistry, Biotechnology and Health, KTH Royal Institute of Technology, SE-100 44 Stockholm, Sweden

<sup>3</sup> Wallenberg Wood Science Center, KTH Royal Institute of Technology, SE-100 44 Stockholm, Sweden

## Supporting Information

### Table of Contents

Chemical synthesis of monosaccharides.....S2 – S5

<sup>1</sup>H and <sup>13</sup>C NMR spectra of monosaccharides.....S6 – S10

Karplus-type relationships.....S11 – S12

**General methods.** Dry acetonitrile (ACN) was purchased from Honeywell Research Chemicals (Bucharest, Romania), and dry *N,N*-dimethylformamide (DMF) and dichloromethane (DCM) were purchased from Acros Organics (Morris Plains, NJ, USA). Methanol (MeOH) was dried over 4 Å molecular sieves. Powdered molecular sieves (4 Å) were activated by heating under high vacuum. All reagents were purchased from Sigma-Aldrich (Geel, Belgium) unless otherwise specified and were used as received. A nitrogen flow was used for reactions requiring inert atmosphere. TLC was carried out on silica gel 60 F254 plates (20 × 20 cm, 0.2 mm thickness) and monitored with UV light (254 – 360 nm) or by a staining solution prepared from ceric ammonium sulfate (2 g) in ethanol (40 mL) and 2 M sulfuric acid (40 mL). Column chromatography was performed on a Biotage Isolera flash chromatography system (Uppsala, Sweden) using KP-Sil or HP-Sil snap silica gel cartridges and purification on Sep-Pak C18 Plus short cartridges, 55 – 105 μm particle size (Waters, Milford, MA, USA). MQ water was obtained from an Elga Purelab Ultra Genetic Water Purification System (High Wycombe, UK).

One-dimensional  $^1\text{H}$  and  $^{13}\text{C}$ , 2D  $^1\text{H}, ^1\text{H}$ -COSY and multiplicity-edited  $^1\text{H}, ^{13}\text{C}$ -HSQC NMR experiments for the characterization of compounds were recorded in  $\text{CDCl}_3$  or  $\text{D}_2\text{O}$  at 298 K on a Bruker AVANCE III HD 400 MHz spectrometer equipped with a 5 mm BBF/H/D 5.0 Z probe or a Bruker AVANCE III 600 MHz spectrometer equipped with a 5 mm TXI inverse Z-Gradient  $^1\text{H}/^{31}\text{P}/^{13}\text{C}$  probe, respectively. NMR chemical shifts were referenced for protected compounds to internal tetramethylsilane ( $\delta_{\text{H}}$  0.0) and for  $^{13}\text{C}$  to the  $\text{CDCl}_3$  solvent peak ( $\delta_{\text{C}}$  77.36); for deprotected compounds internal sodium 3-trimethylsilyl-(2,2,3,3- $^2\text{H}_4$ )-propanoate in  $\text{D}_2\text{O}$  ( $\delta_{\text{H}}$  0.0) and external 10% dioxane in  $\text{D}_2\text{O}$  ( $\delta_{\text{C}}$  67.4) were used as chemical shift references.

High-resolution mass spectrometry (HRMS) experiments were conducted on Bruker Daltonics micrOTOF or micrOTOFQ spectrometers (Bremen, Germany) using electrospray ionization (ESI) in the positive mode. Samples were prepared using a solution of acetone and  $\text{H}_2\text{O}$  in a 1:1 ratio.

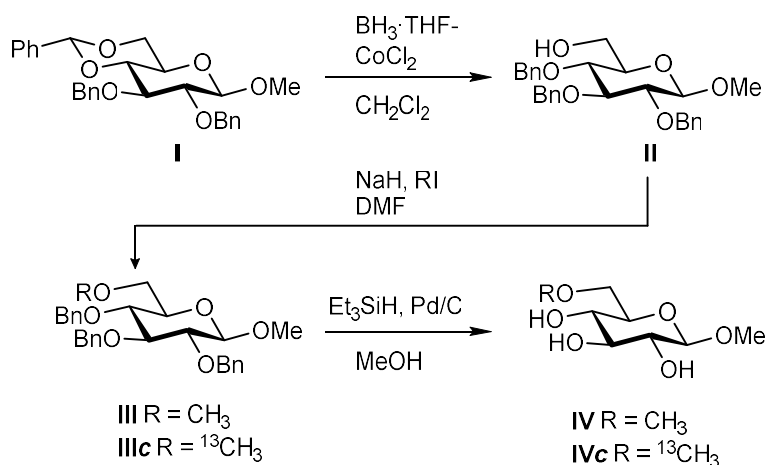

Scheme S1. Synthesis of methyl 6-*O*-methyl-β-D-glucopyranoside.

### Methyl 2,3,4-tri-*O*-benzyl-β-D-glucopyranoside (II)

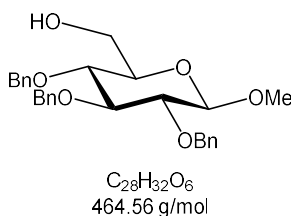

To a stirred 1 M  $BH_3 \cdot THF$  solution (2.6 mL – 3 eq) at r.t. containing methyl 2,3-di-*O*-benzyl-4,6-*O*-benzylidene-β-D-glucopyranoside (**I**, 0.86 mmol – 1 eq)  $CoCl_2$  (2.58 mmol – 3 eq) was added portionwise whereafter stirring continued for 5 min. The mixture was then diluted with EtOAc, filtrated and aq  $NaBH_4$  (0.5 eq) was added. The organic fraction was washed with aq  $NaHCO_3$  solution, water, dried over  $Na_2SO_4$  and concentrated under vacuum to afford a yellow oil. Purification by flash column chromatography ( $R_f$ : 0.55, dichloromethane/ethyl acetate, 9:1) gave a white powder (85% yield).  $^1H$  NMR (400 MHz,  $CDCl_3$ ):  $\delta$  7.36 – 7.25 (*m*, 15H, Ar (Bn)), 4.95 – 4.62 (*m*, 6H,  $CH_2$  (Bn)), 4.35 (*d*, 1H,  $J_{H1,H2} = 7.80$  Hz, H-1), 3.88 (*ddd*, 1H,  $J_{H5,H6a} = 2.75$  Hz,  $J_{H6a,H6b} = 11.88$  Hz,  $J_{H6a,OH} = 5.89$  Hz, H-6a), 3.72 (*ddd*, 1H,  $J_{H5,H6b} = 4.54$  Hz,  $J_{H6a,H6b} = 11.88$  Hz,  $J_{H6b,OH} = 7.56$  Hz, H-6b), 3.67 (*dd*, 1H,  $J_{H2,H3} = 9.01$  Hz,  $J_{H3,H4} = 9.00$ , H-3), 3.57 (*dd*, 1H,  $J_{H3,H4} = 9.00$ ,  $J_{H4,H5} = 9.62$  Hz, H-4), 3.57 (*s*, 3H,  $CH_3$ ), 3.39 (*dd*, 1H,  $J_{H1,H2} = 7.80$  Hz,  $J_{H2,H3} = 9.01$  Hz, H-2), 3.37 (*ddd*, 1H,  $J_{H4,H5} = 9.62$  Hz,  $J_{H5,H6a} = 2.75$  Hz,  $J_{H5,H6b} = 4.54$  Hz, H-5), 1.89 (*dd*,  $J_{H6a,OH} = 5.89$  Hz,  $J_{H6b,OH} = 7.56$  Hz, 1H, OH).  $^{13}C$ -NMR (100 MHz,  $CDCl_3$ ):  $\delta$  138.8, 138.7, 138.3, 128.8, 128.7, 128.4, 128.23, 128.18, 128.0, 127.9 (Ar), 105.1 (C1), 84.7 (C3), 82.7 (C2), 77.8 (C4), 76.0 ( $CH_2$ ), 75.4 ( $CH_2$ ), 75.3 (C5), 75.1 ( $CH_2$ ), 62.3 (C6), 57.6 ( $CH_3$ ). ESI-HRMS:  $[M + Na]^+$   $m/z$  calculated for  $C_{28}H_{32}O_6Na$  487.2091, found 487.2102 (error –1.1 ppm).

### Methyl 2,3,4-tri-*O*-benzyl-6-*O*-methyl-β-D-glucopyranoside (III)

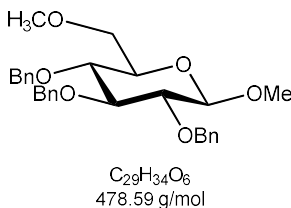

To a solution of methyl 2,3,4-tri-*O*-benzyl-β-D-glucopyranoside (0.52 mmol – 1 eq) in dry DMF (5 mL)  $NaH$  (1.3 mmol – 2.5 eq) was added at 0 °C under  $N_2$  atmosphere and the mixture was left under stirring for 2 h.  $MeI$  was hence added dropwise (1.04 mmol – 2.0 eq) and stirring continued for 6 h. The reaction was quenched by addition of  $MeOH$ , and the mixture was co-evaporated with toluene, diluted with EtOAc and washed with  $H_2O$  and brine. The organic fraction was dried over  $Na_2SO_4$  and concentrated under vacuum to afford a yellow oil. The product was purified by flash column chromatography ( $R_f$ : 0.43, petroleum ether/ethyl acetate, 8:2) to yield a colorless oil (75% yield).  $^1H$  NMR (400 MHz,  $CDCl_3$ ):  $\delta$  7.37 – 7.22 (*m*, 15H, Ar (Bn)), 4.96 – 4.57

(*m*, 6H, CH<sub>2</sub> (Bn)), 4.30 (*d*, 1H,  $J_{H1,H2}$  = 7.80, H-1), 3.66 – 3.56 (*nr*, 2H, H-6a, H6b), 3.64 (*nr*, 1H, H-3), 3.60 (*nr*, 1H, H-4), 3.55 (*s*, 3H, CH<sub>3</sub>), 3.44 (*dd*, 1H,  $J_{H1,H2}$  = 7.80,  $J_{H2,H3}$  = 8.65, H-2), 3.41 (*m*, 1H,  $J_{HH}$  = 2.90,  $J_{HH}$  = 4.30, H-5), 3.36 (*s*, 3H, 6-*O*-CH<sub>3</sub>). <sup>13</sup>C NMR (100 MHz, CDCl<sub>3</sub>):  $\delta$  138.9, 138.8, 138.5, 128.6, 128.3, 128.2, 128.03, 127.98, 127.8, 127.7 (Ar), 105.0 (C1), 84.8 (C3), 82.5 (C2), 77.9 (C4), 75.8 (CH<sub>2</sub>), 75.2 (CH<sub>2</sub>), 74.93 (CH<sub>2</sub>), 74.86 (C5), 71.4 (C6), 59.6 (6-*O*-CH<sub>3</sub>), 57.3 (CH<sub>3</sub>). ESI-HRMS: [M + Na]<sup>+</sup> *m/z* calculated for C<sub>29</sub>H<sub>34</sub>O<sub>6</sub>Na 501.2248, found 501.2265 (error –3.4 ppm).

### Methyl 2,3,4-tri-*O*-benzyl-6-*O*-[<sup>13</sup>C]methyl- $\beta$ -D-glucopyranoside (IIIc)

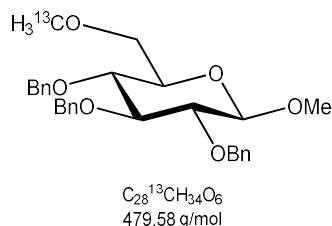

To a solution of methyl 2,3,4-tri-*O*-benzyl- $\beta$ -D-glucopyranoside (0.52 mmol – 1 eq) in dry DMF (5 mL) NaH (1.3 mmol – 2.5 eq) was added at 0 °C under N<sub>2</sub> atmosphere and the mixture was left under stirring for 2 h. [<sup>13</sup>C]methyl iodide was hence added dropwise (1.04 mmol – 2.0 eq) and stirring continued for 6 h. The reaction was quenched by addition of MeOH, and the mixture was co-evaporated with toluene, diluted with EtOAc and washed with H<sub>2</sub>O and brine. The organic fraction was dried over Na<sub>2</sub>SO<sub>4</sub> and concentrated under vacuum to afford a yellow oil. The product was purified by flash column chromatography (*R<sub>f</sub>*: 0.43, petroleum ether/ethyl acetate 8:2) yielding a colorless oil (79 % yield). <sup>1</sup>H NMR (400 MHz, CDCl<sub>3</sub>):  $\delta$  7.37 – 7.23 (*m*, 15H, Ar (Bn)), 4.95 – 4.57 (*m*, 6H, CH<sub>2</sub> (Bn)), 4.30 (*dd*, 1H,  $J_{H1,H2}$  = 7.78, H-1), 3.64 (*m*, 1H, H-3), 3.63 (*m*, 1H, H-6a), 3.60 (*m*, 1H, H6b), 3.59 (*m*, 1H, H-4), 3.56 (*s*, 3H, CH<sub>3</sub>), 3.44 (*dd*, 1H,  $J_{H1,H2}$  = 7.78, H-2), 3.41 (*m*, 1H, H-5), 3.37 (*d*, 3H, <sup>1</sup> $J_{CH}$  = 141 Hz, <sup>13</sup>CH<sub>3</sub>). <sup>13</sup>C NMR (100 MHz, CDCl<sub>3</sub>):  $\delta$  139.0, 138.9, 138.5, 128.8, 128.7, 128.4, 128.3, 128.2, 128.1, 127.92, 127.87 (Ar), 105.1 (C1), 84.9 (C3), 82.6 (C2), 78.0 (C4), 75.9 (CH<sub>2</sub>), 75.4 (CH<sub>2</sub>), 75.1 (CH<sub>2</sub>), 75.0 (*d*, <sup>3</sup> $J_{CC}$  = 3.8 Hz, C-5), 71.6 (*d*, <sup>2</sup> $J_{CC}$  = 1.9 Hz, C-6), 59.7 (6-*O*-<sup>13</sup>CH<sub>3</sub>), 57.4 (CH<sub>3</sub>). ESI-HRMS: [M + Na]<sup>+</sup> *m/z* calculated for C<sub>28</sub>-<sup>13</sup>CH<sub>34</sub>O<sub>6</sub>Na 502.2281, found 502.2306 (error –4.9 ppm).

### Methyl 6-*O*-methyl- $\beta$ -D-glucopyranoside (IV)

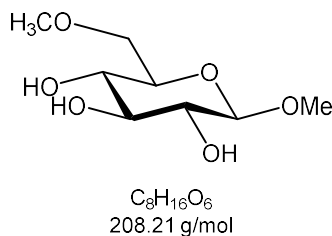

To a solution of methyl 2,3,4-tri-*O*-benzyl-6-*O*-methyl- $\beta$ -D-glucopyranoside (0.21 mmol – 1 eq) and Pd(OH)<sub>2</sub>/C (10% w/w) in methanol (3 mL) at r.t. Et<sub>3</sub>SiH (0.63 mmol – 3.0 eq) was added portionwise whereafter the progress of the reaction was monitored by TLC. The mixture was hence filtrated through a short pad of Celite and concentrated under vacuum to afford a white amorphous solid. The crude product was purified by reverse phase chromatography with a t-C18 Sep-Pak® cartridge and isolated by gel permeation chromatography using an ÄKTA™ system equipped with a Superdex™ column (GE Healthcare, Uppsala, Sweden) to yield a white powder quantitatively. <sup>1</sup>H NMR (600 MHz, D<sub>2</sub>O):  $\delta$  4.375 (*d*, 1H,  $J_{H1,H2}$  = 8.02 Hz, H-1), 3.793 (*dd*, 1H,  $J_{H5,H6a}$  = 2.09 Hz,  $J_{H6a,H6b}$  = –11.26 Hz, H-6a), 3.644 (*dd*, 1H,  $J_{H5,H6b}$  = 6.35 Hz,  $J_{H6a,H6b}$  = –11.26 Hz, H-6b), 3.570 (*ddd*, 1H,  $J_{H4,H5}$  = 9.86,  $J_{H5,H6a}$  = 2.09 Hz,  $J_{H5,H6b}$  = 6.35 Hz, H-5), 3.569 (*s*, 3H, CH<sub>3</sub>), 3.485 (*dd*, 1H,  $J_{H2,H3}$  = 9.42 Hz,  $J_{H3,H4}$  = 9.20, H-3), 3.417 (*s*, 3H, 6-*O*-CH<sub>3</sub>), 3.379 (*dd*, 1H,  $J_{H3,H4}$  = 9.20,  $J_{H4,H5}$  = 9.86, H-4), 3.260 (*dd*, 1H,  $J_{H1,H2}$  = 8.02 Hz,  $J_{H2,H3}$  = 9.42 Hz, H-2). <sup>13</sup>C NMR (150 MHz, D<sub>2</sub>O):  $\delta$  104.1 (C-1), 76.5 (C-3), 75.3 (C-5), 73.8 (C-2), 71.9 (C-6), 70.5 (C-4), 59.4 (6-*O*-CH<sub>3</sub>), 58.1 (CH<sub>3</sub>). ESI-HRMS: [M + Na]<sup>+</sup> *m/z* calculated for C<sub>8</sub>H<sub>16</sub>O<sub>6</sub>Na 231.0839, found 231.0845 (error –2.7 ppm).

#### Methyl 6-*O*-[<sup>13</sup>C]methyl- $\beta$ -D-glucopyranoside (IVc)

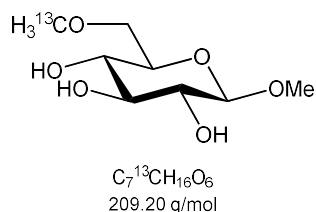

To a solution of methyl 2,3,4-tri-*O*-benzyl-6-*O*-[<sup>13</sup>C]methyl- $\beta$ -D-glucopyranoside (0.21 mmol – 1 eq) and Pd(OH)<sub>2</sub>/C (10% w/w) in methanol (3 mL) at r.t. Et<sub>3</sub>SiH (0.63 mmol – 3.0 eq) was added portionwise whereafter the progress of the reaction was monitored by TLC. The mixture was hence filtrated through a short pad of Celite and concentrated under vacuum to afford a white amorphous solid. The crude product was purified by reverse phase chromatography with t-C18 Sep-Pak® cartridges and isolated by gel permeation chromatography using an ÄKTA™ system equipped with a Superdex™ column (GE Healthcare, Uppsala, Sweden) to yield a white powder quantitatively. <sup>1</sup>H NMR (600 MHz, D<sub>2</sub>O):  $\delta$  4.376 (*d*, 1H,  $J_{H1,H2}$  = 8.01 Hz, H-1), 3.793 (*ddd*, 1H,  $J_{H5,H6a}$  = 2.24 Hz,  $J_{H6a,H6b}$  = –11.28 Hz,  $J_{C,H6a}$  = 2.69 Hz, H-6a), 3.645 (*ddd*, 1H,  $J_{H5,H6b}$  = 6.56 Hz,  $J_{H6a,H6b}$  = –11.28 Hz,  $J_{C,H6b}$  = 3.16 Hz, H-6b), 3.572 (*ddd*, 1H,  $J_{H4,H5}$  = 9.78,  $J_{H5,H6a}$  = 2.24 Hz,  $J_{H5,H6b}$  = 6.56 Hz, H-5), 3.570 (*s*, 3H, CH<sub>3</sub>), 3.486 (*dd*, 1H,  $J_{H2,H3}$  = 9.44 Hz,  $J_{H3,H4}$  = 9.22, H-3), 3.415 (*d*, 3H, 6-*O*-<sup>13</sup>CH<sub>3</sub>, <sup>1</sup>*J*<sub>CH</sub> = 143 Hz), 3.380 (*dd*, 1H,  $J_{H3,H4}$  = 9.22,  $J_{H4,H5}$  = 9.78, H-4), 3.261 (*dd*, 1H,  $J_{H1,H2}$  = 8.01 Hz,  $J_{H2,H3}$  = 9.44 Hz, H-2). <sup>13</sup>C NMR (150 MHz, D<sub>2</sub>O):  $\delta$  104.1 (C-1), 76.4 (C-3), 75.3 (*d*, <sup>3</sup>*J*<sub>CC</sub> = 3.4 Hz, C-5), 73.8 (C-2), 71.9 (*d*, <sup>2</sup>*J*<sub>CC</sub> = 1.5 Hz, C-6), 70.5 (C-4), 59.3 (6-*O*-<sup>13</sup>CH<sub>3</sub>), 58.1 (CH<sub>3</sub>). ESI-HRMS: [M + Na]<sup>+</sup> *m/z* calculated for C<sub>7</sub><sup>13</sup>CH<sub>16</sub>O<sub>6</sub>Na 232.0872, found 232.0865 (error 3.1 ppm).

**$^1\text{H}$  and  $^{13}\text{C}$  NMR spectra of compound II**

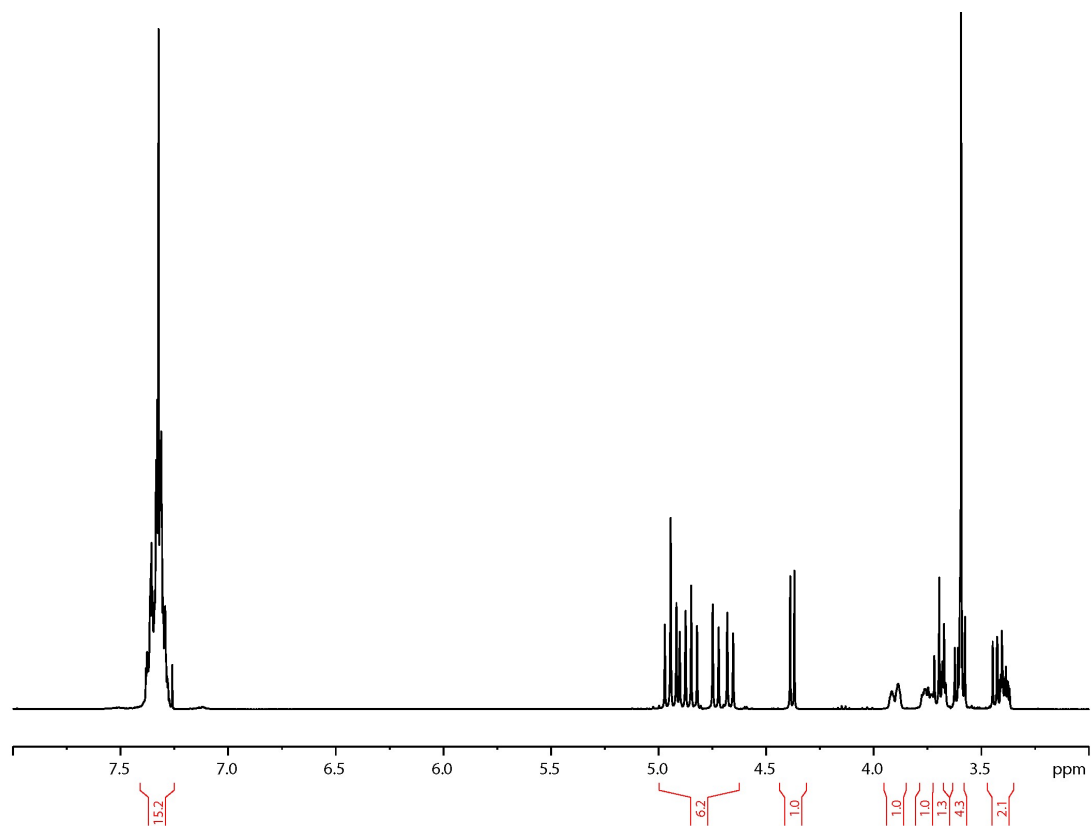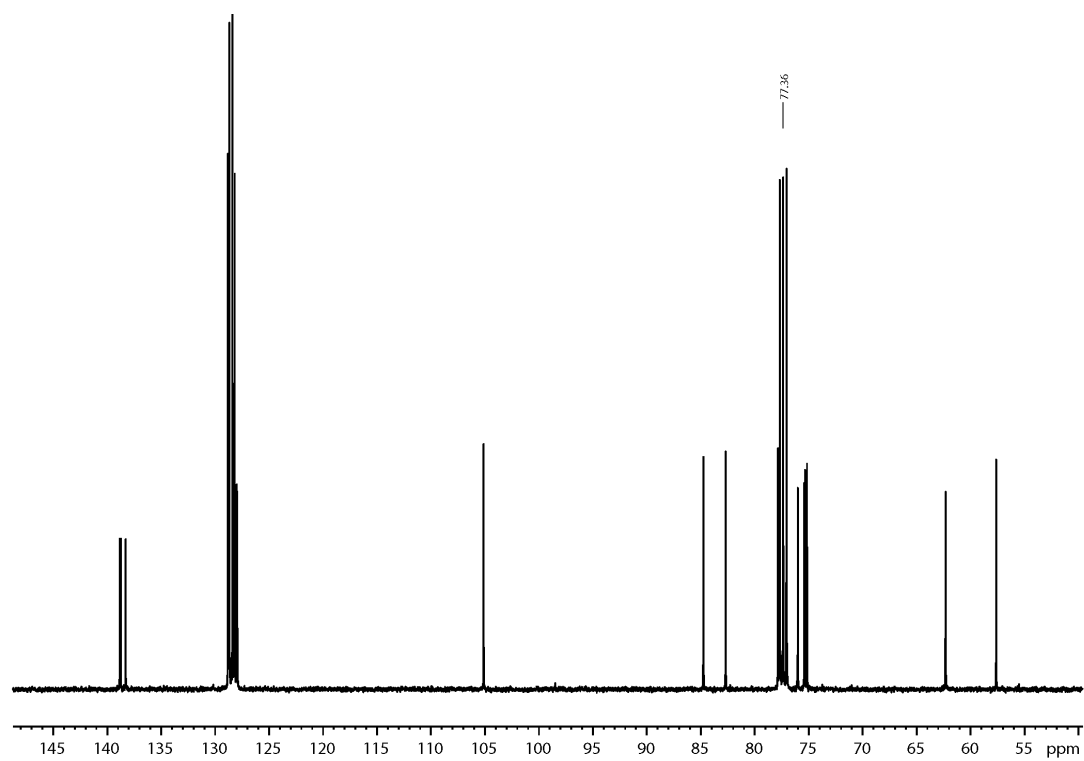

**$^1\text{H}$  and  $^{13}\text{C}$  NMR spectra of compound III**

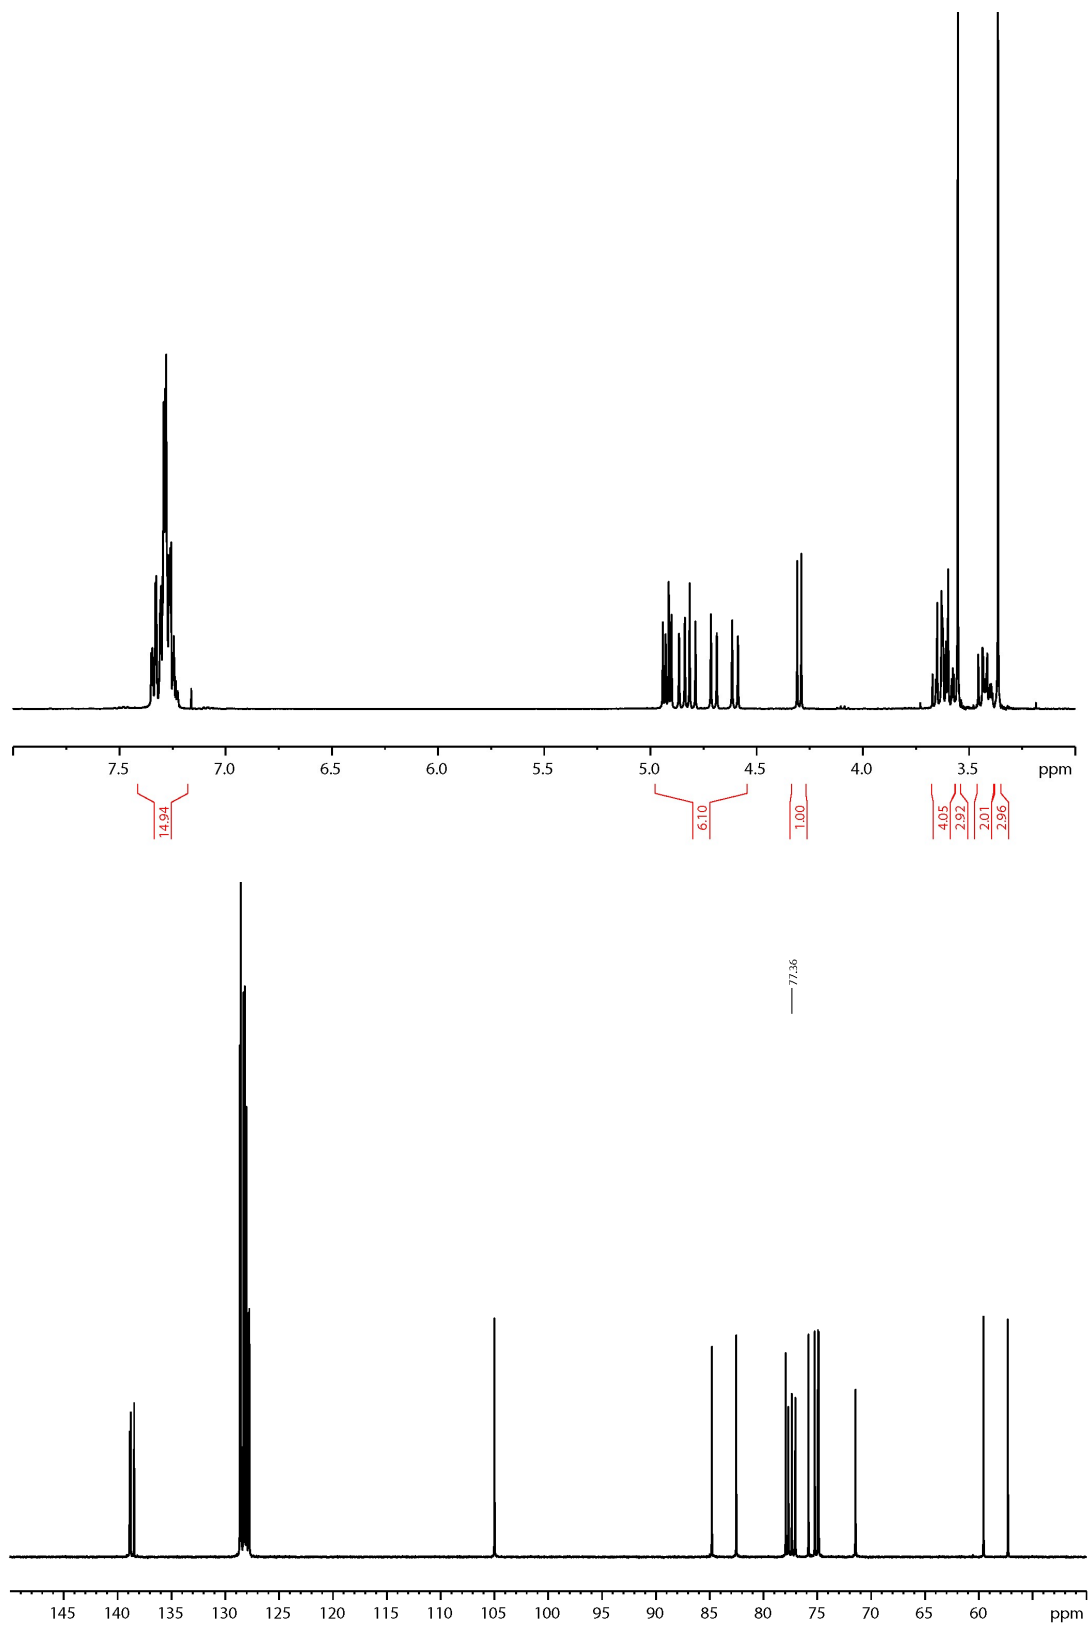

$^1\text{H}$  and  $^{13}\text{C}$  NMR spectra of compound IIIc

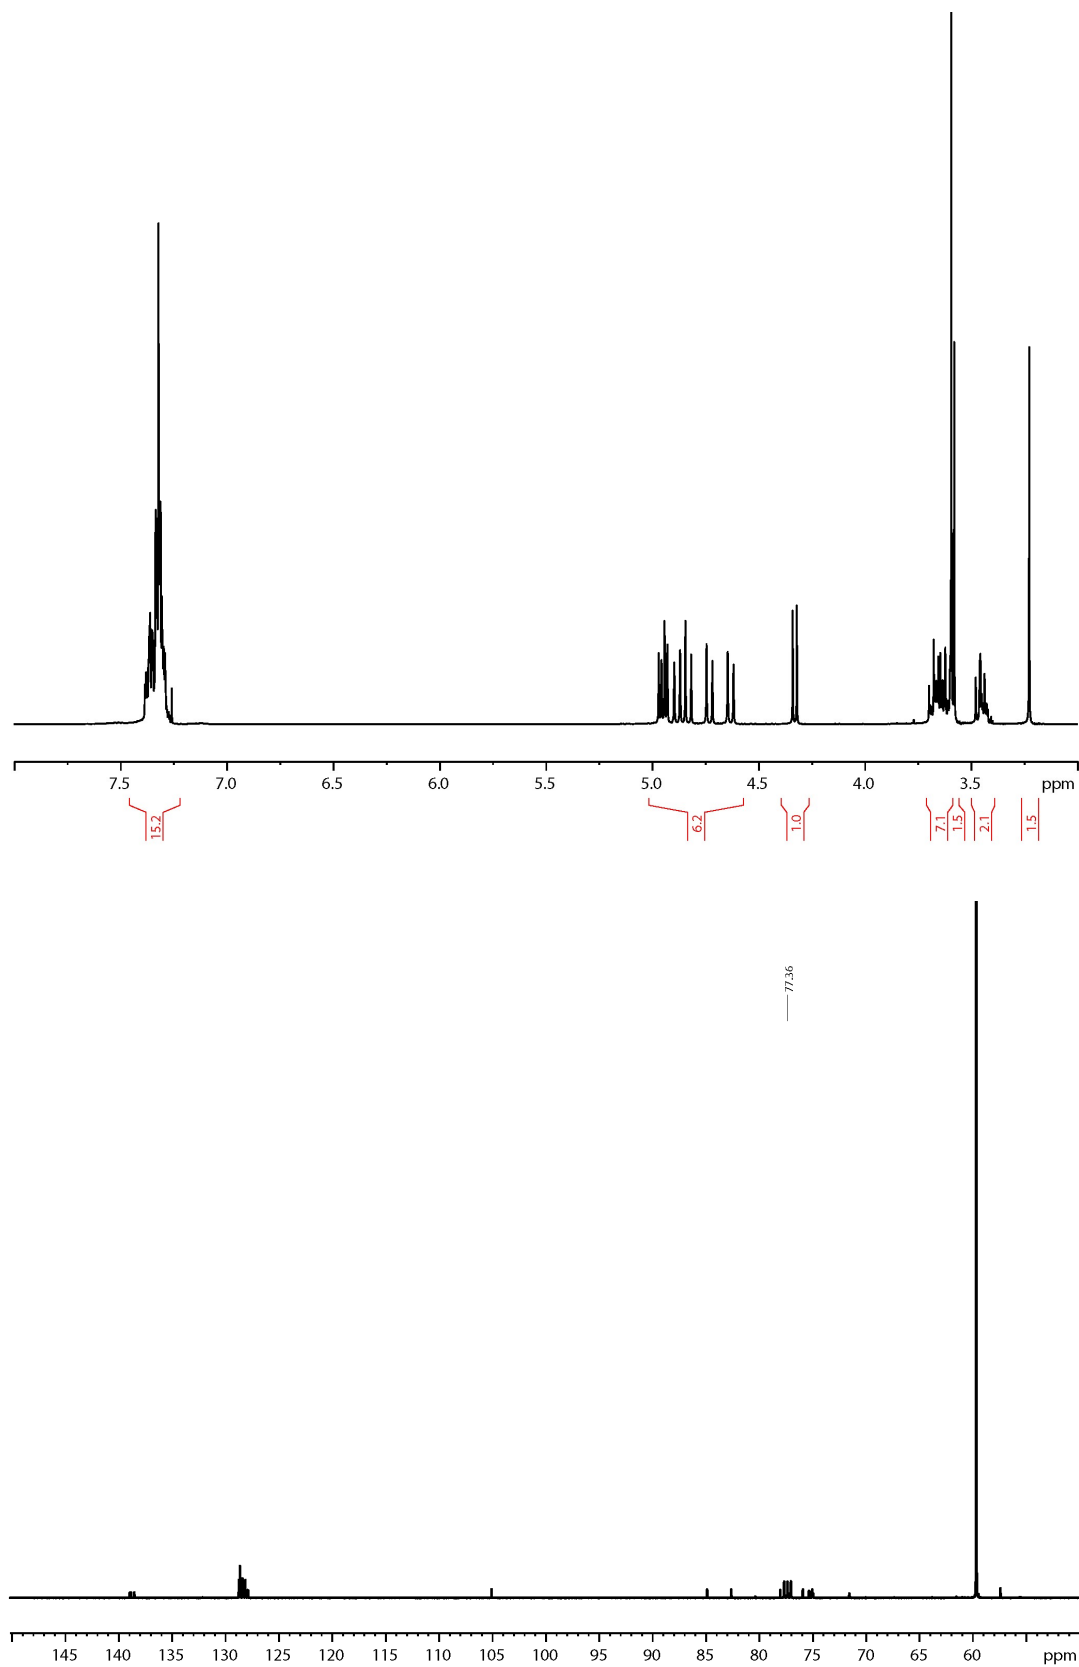



**$^1\text{H}$  and  $^{13}\text{C}$  NMR spectra of compound IV**

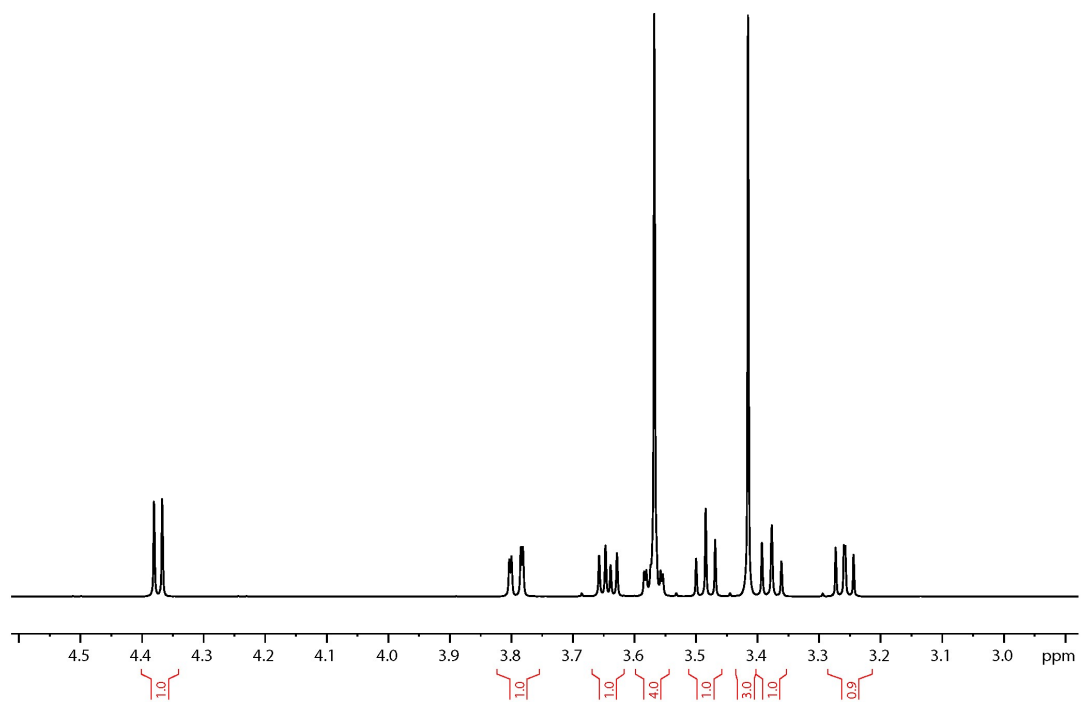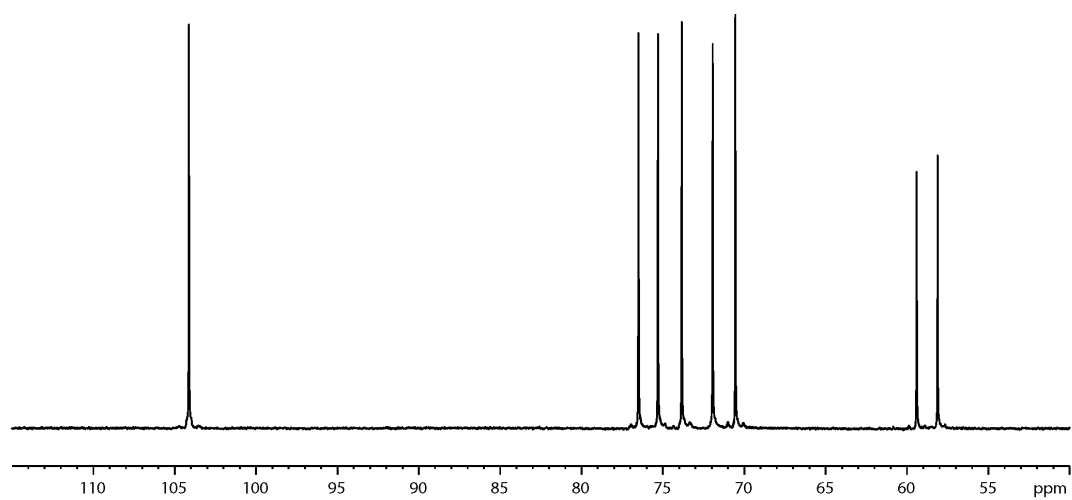

**$^1\text{H}$  and  $^{13}\text{C}$  NMR spectra of compound IVc**

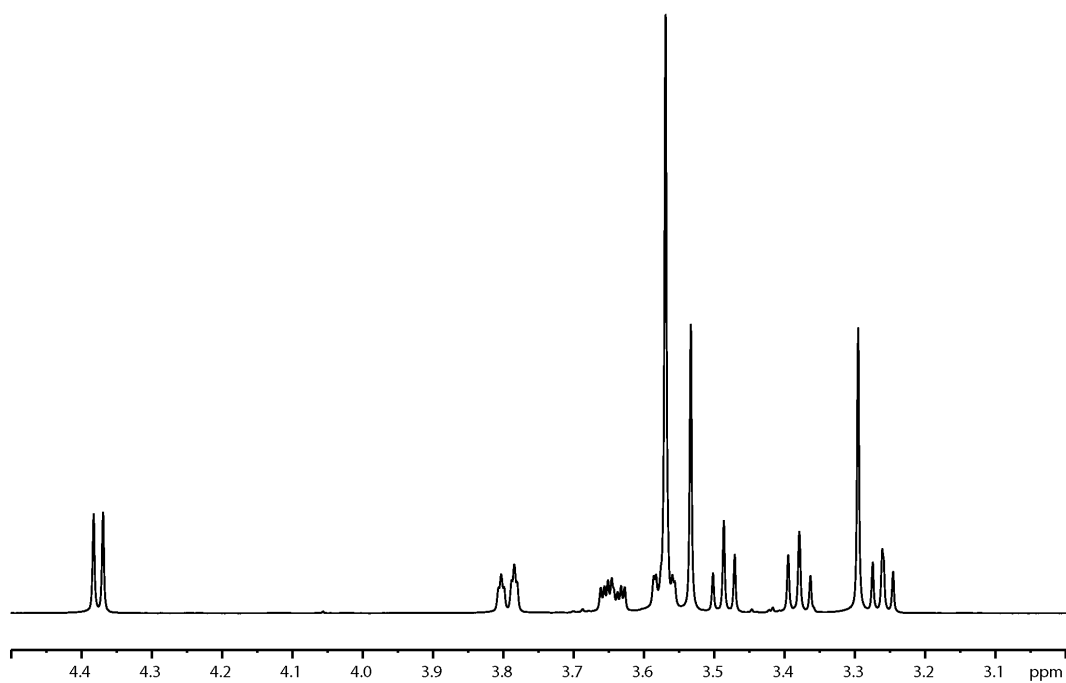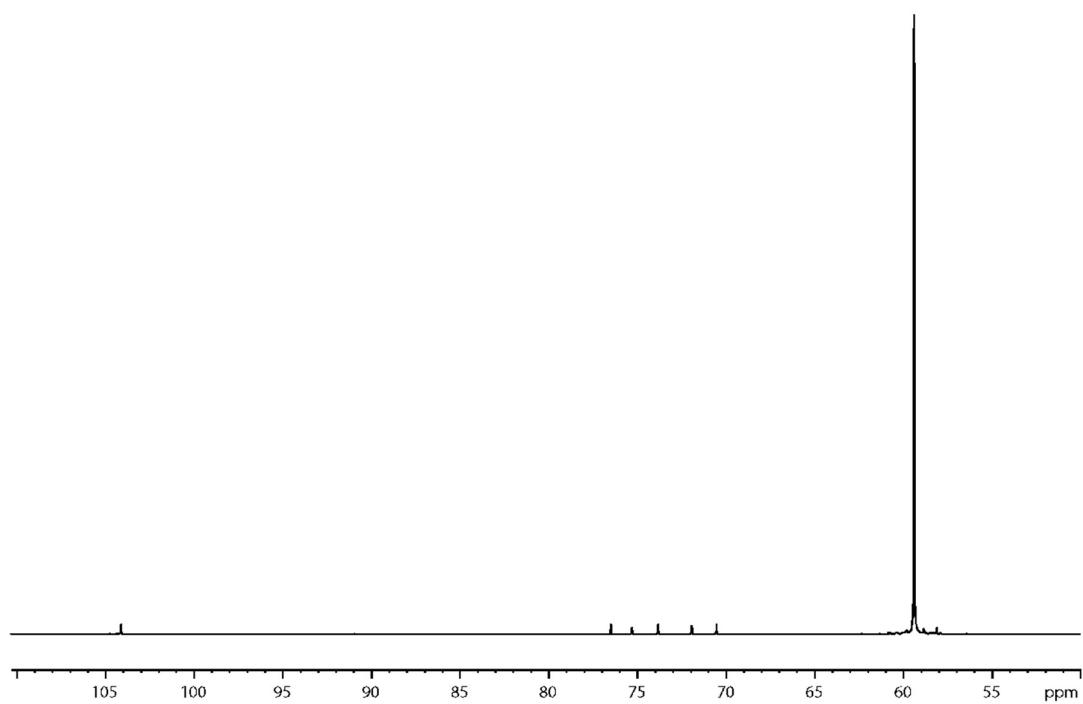

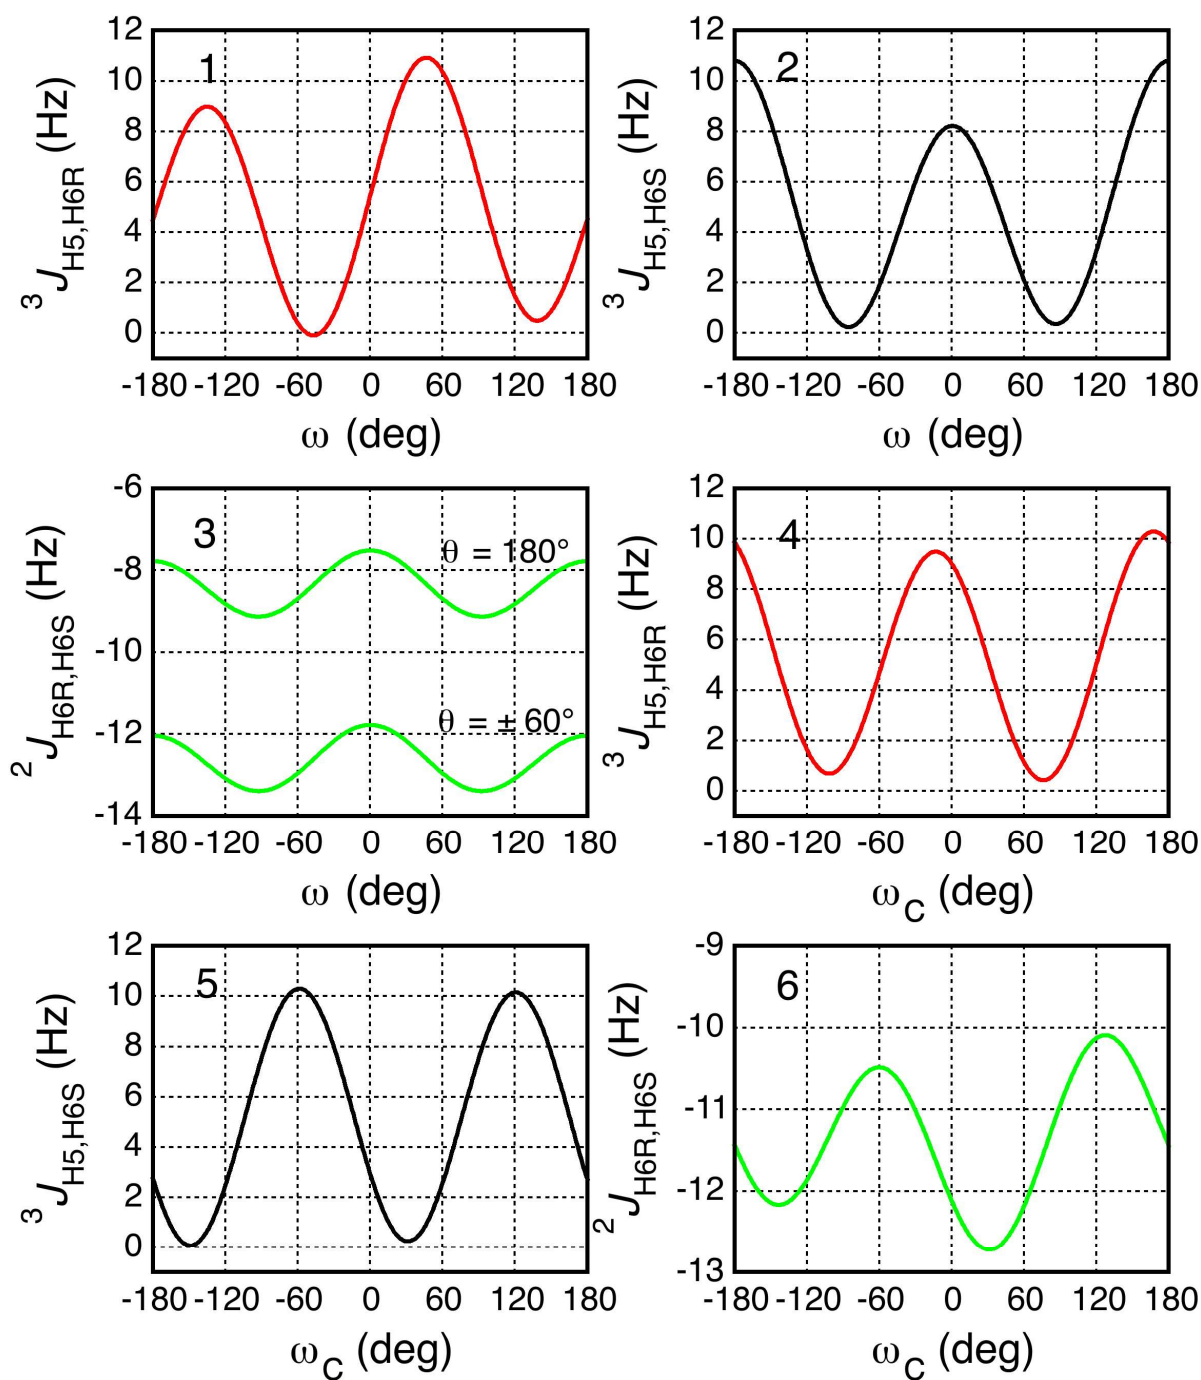

Karplus-type relationships for eqns 1 – 6.

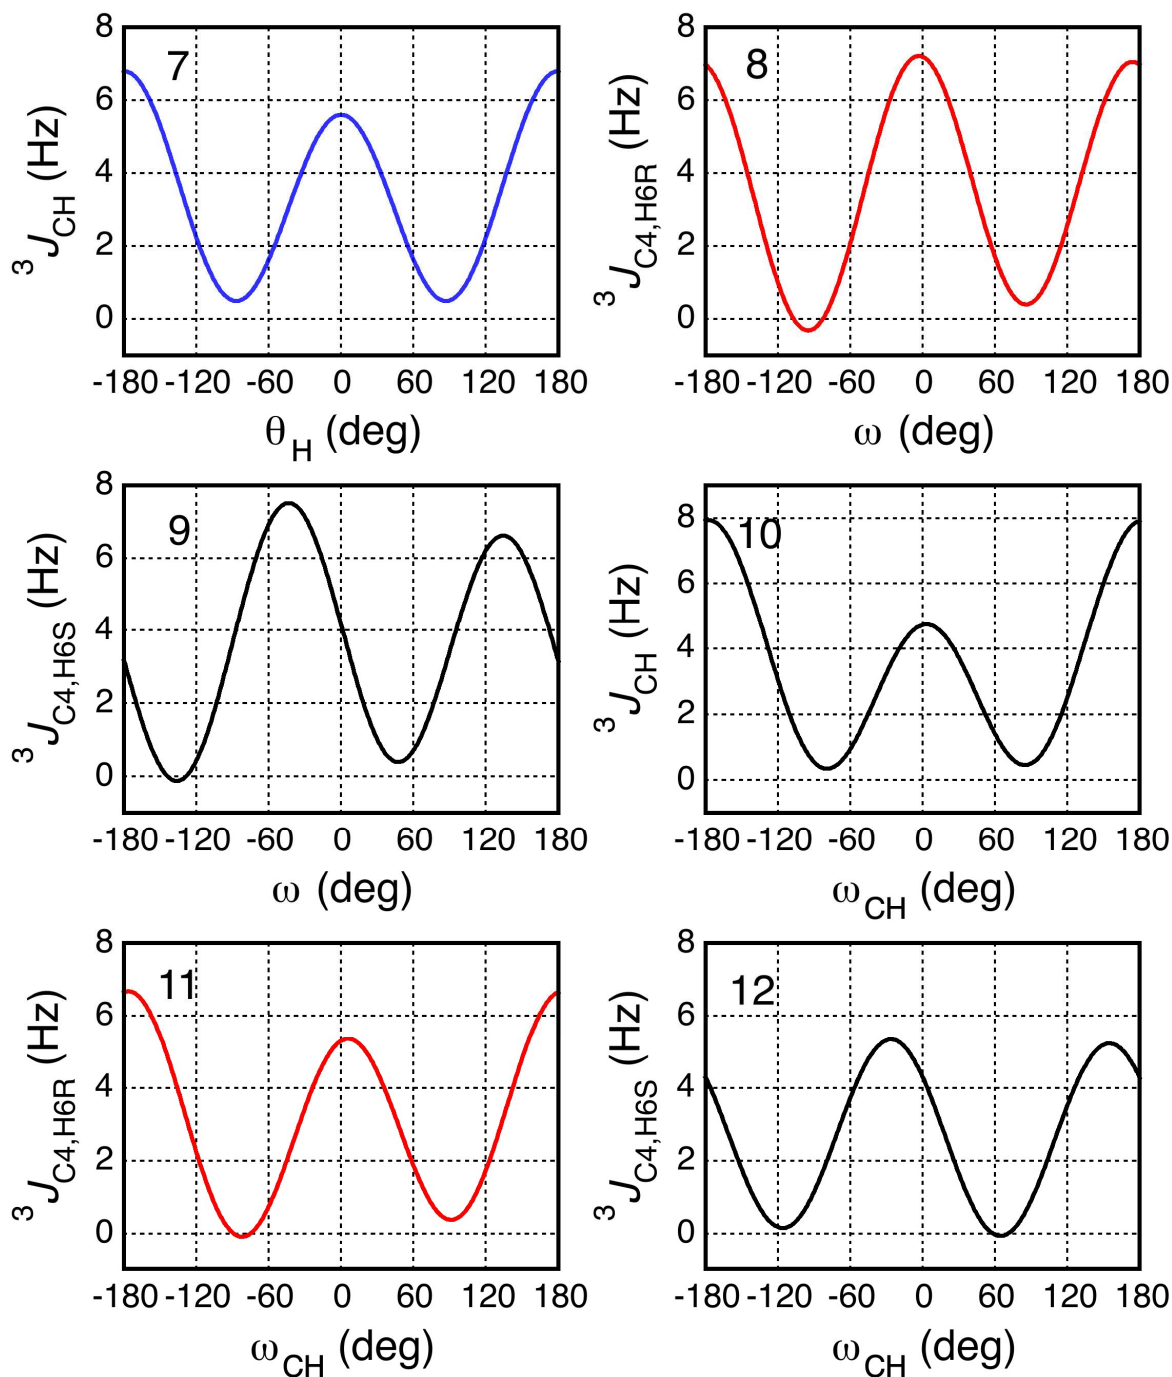

Karplus-type relationships for eqns 7 – 12.
